# Supplementary material
Source: Springer Nature journal article supplement (https://www.springermedizin.de/resource/supplementary/13054_2012_667_MOESM7_ESM.pdf/9708950)
Supplement: MOESM7 [file 9708950]

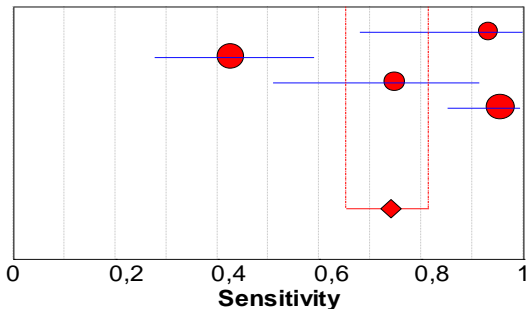

**Sensitivity (95% CI)**

|                    |      |               |
|--------------------|------|---------------|
| Bergeron 2001      | 0,93 | (0,68 - 1,00) |
| Van Eijk 2009      | 0,43 | (0,28 - 0,59) |
| George 2011        | 0,75 | (0,51 - 0,91) |
| Gusmao-Flores 2011 | 0,96 | (0,85 - 0,99) |

Pooled Sensitivity = 0,74 (0,65 to 0,81)  
Chi-square = 37,35; df = 3 (p = 0,0000)  
Inconsistency (I-square) = 92,0 %

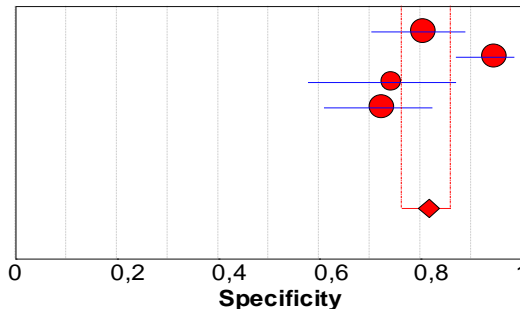

**Specificity (95% CI)**

|                    |      |               |
|--------------------|------|---------------|
| Bergeron 2001      | 0,81 | (0,70 - 0,89) |
| Van Eijk 2009      | 0,95 | (0,87 - 0,99) |
| George 2011        | 0,74 | (0,58 - 0,87) |
| Gusmao-Flores 2011 | 0,73 | (0,61 - 0,82) |

Pooled Specificity = 0,82 (0,76 to 0,86)  
Chi-square = 16,31; df = 3 (p = 0,0010)  
Inconsistency (I-square) = 81,6 %
